# Supplementary material
Source: PubMed Central journal article supplement (PMC4636967)
Supplement: NIHMS433814-supplement-01.pdf [file NIHMS433814-supplement-01.pdf]

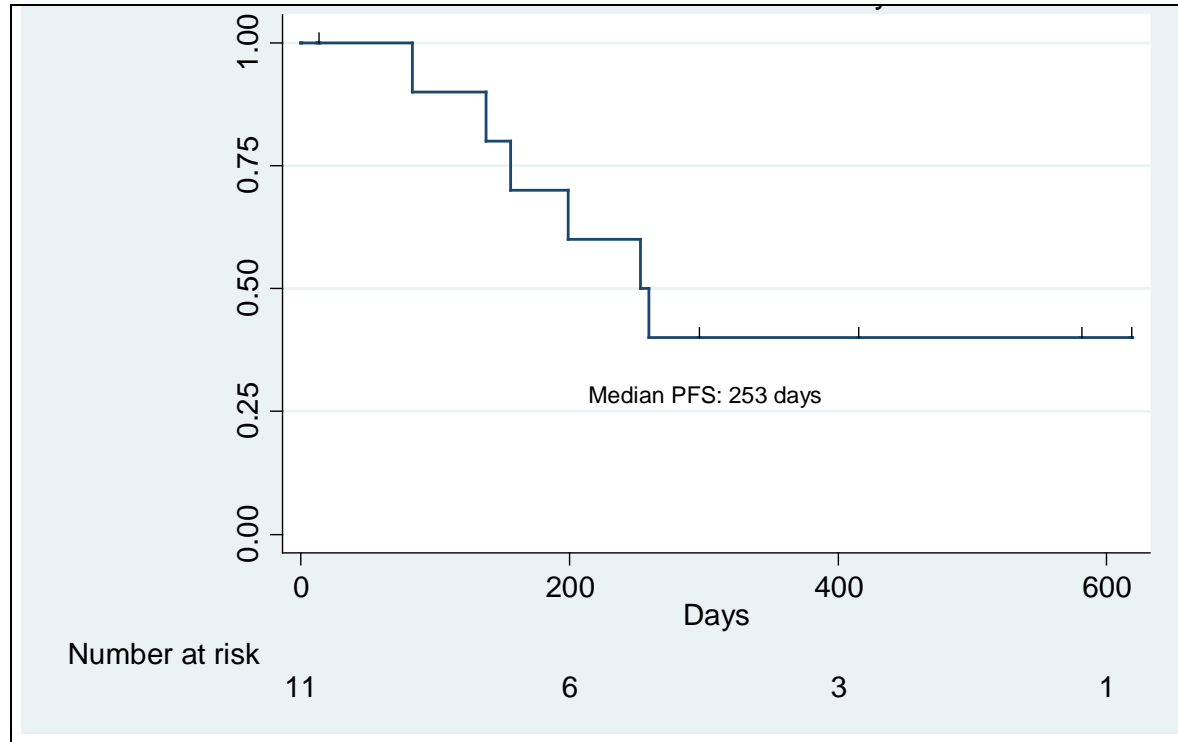

**Supplemental Figure 1. Yeast-brachyury progression-free survival; chordoma patients only.** Progression-free survival (PFS) for chordoma patients treated with yeast-brachyury. Median PFS is 253 days.
